# Supplementary material for: Photoluminescence properties of Yb2+ ions doped in the perovskites CsCaX3 and CsSrX3 (X = Cl, Br, and I) – a comparative study
Source: Royal Society of Chemistry journal article supplement (doi:10.1039/c6cp00085a), 2016-01-01
Supplement: c6cp00085a1.pdf [file c6cp00085a1.pdf]

## Electronic Supplementary Information (ESI)

### Photoluminescence of $\text{Yb}^{2+}$ ions doped in the perovskites $\text{CsCaX}_3$ and $\text{CsSrX}_3$ ( $\text{X} = \text{Cl}, \text{Br}, \text{I}$ ) – A comparative study

Markus Suta<sup>a</sup>, Werner Urland<sup>b</sup>, Claude Daul<sup>b</sup> and Claudia Wickleder<sup>\*a</sup>

<sup>a</sup> *Inorganic Chemistry, Faculty of Science and Technology, University of Siegen, Adolf-Reichwein-Str. 2, 57068 Siegen, Germany*

<sup>b</sup> *Department of Chemistry, University of Fribourg, Chemin du Musée 9, 1700 Fribourg, Switzerland*

E-Mail: [wickleder@chemie.uni-siegen.de](mailto:wickleder@chemie.uni-siegen.de), Fax: +49-271-7402555, Tel: +49-271-7404217

#### X-ray powder diffraction patterns of $\text{CsMX}_3$ : 0.1% $\text{Yb}^{2+}$ ( $\text{M} = \text{Ca}, \text{Sr}$ ; $\text{X} = \text{Cl}, \text{Br}, \text{I}$ )

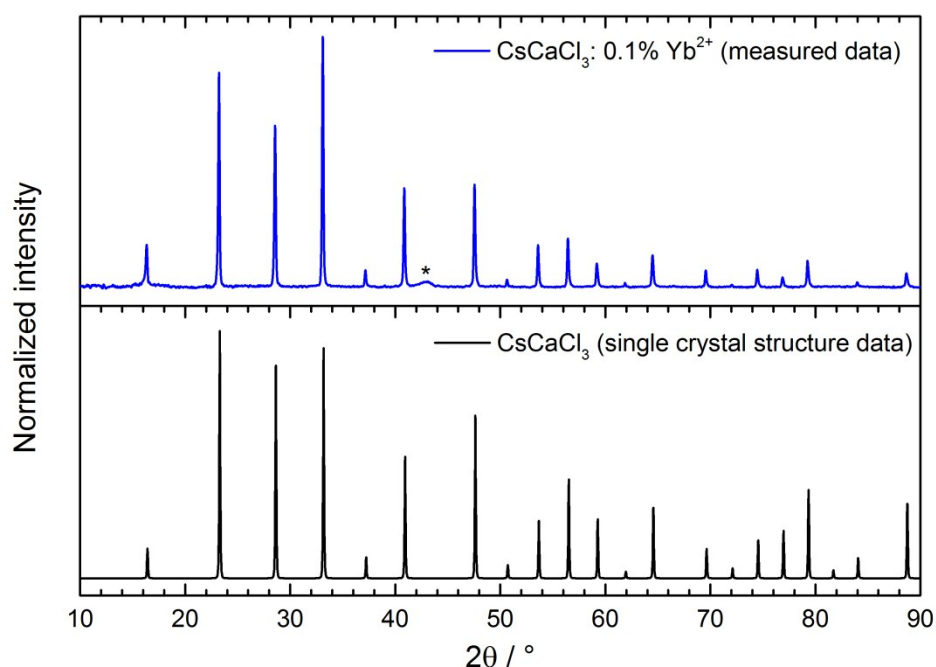

**Figure S1.** Measured XRD pattern of  $\text{CsCaCl}_3$ : 0.1%  $\text{Yb}^{2+}$  (blue) compared to the diffraction pattern based on single crystal structure data (based on reference 54 in the main article). The black asterisk marks a reflection from the silicon grease used for the sample preparation.

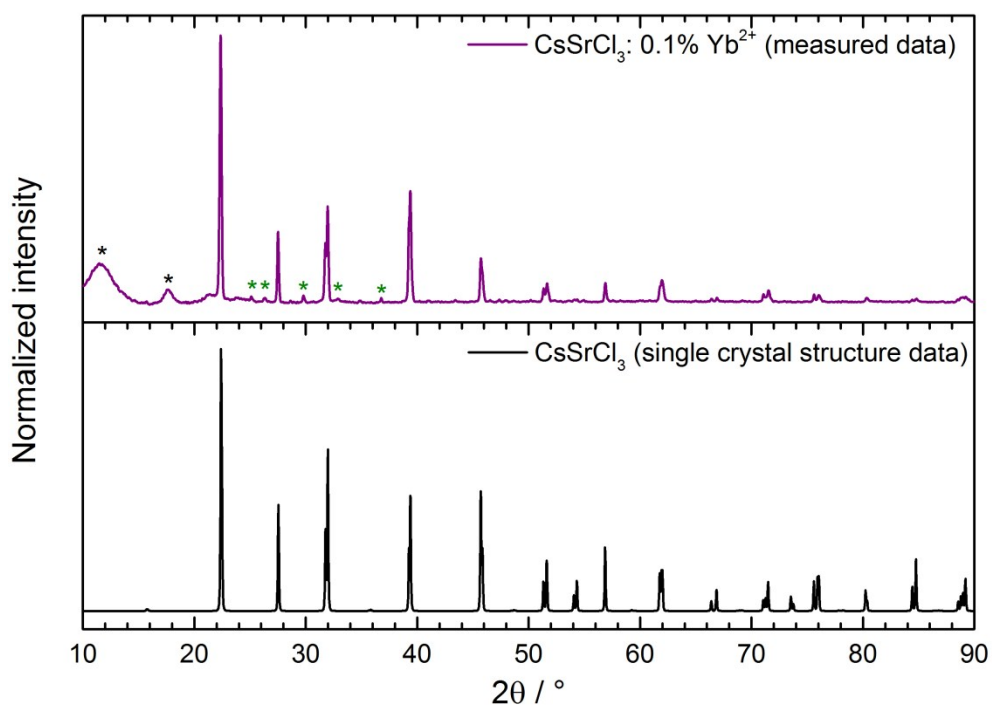

**Figure S2.** Measured XRD pattern of CsSrCl<sub>3</sub>: 0.1% Yb<sup>2+</sup> (violet) compared to the diffraction pattern based on single crystal structure data (based on reference 55 in the paper). The black asterisks mark reflections from the silicon grease used for the sample preparation. The green asterisks mark reflections arising from *in situ* hydrate formation during the measurement on air (they grow in intensity after subsequent measurements).

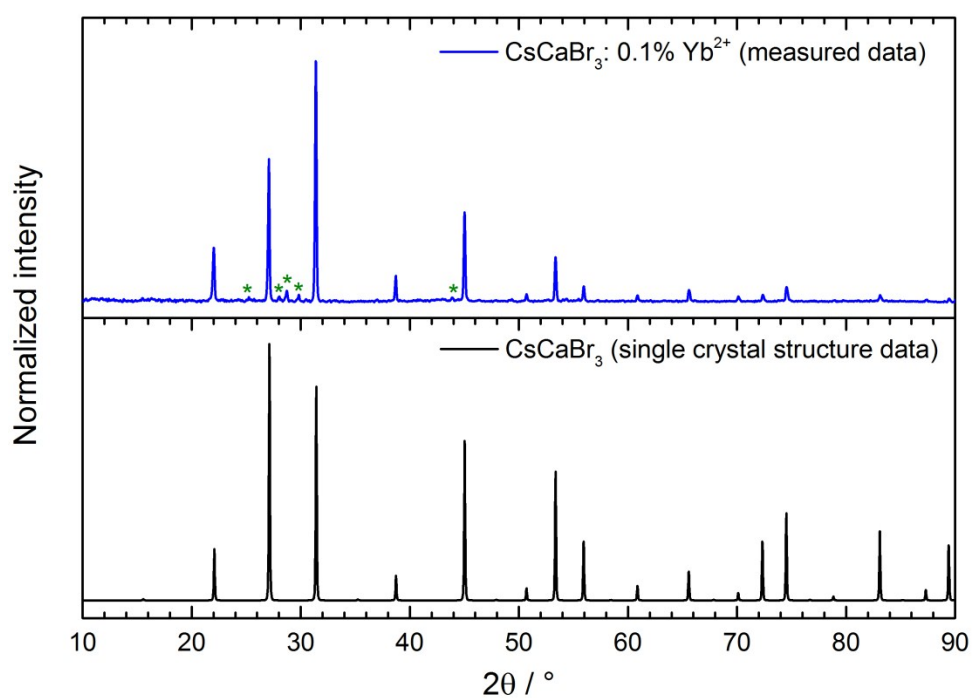

**Figure S3.** Measured XRD pattern of CsCaBr<sub>3</sub>: 0.1% Yb<sup>2+</sup> (blue) compared to the diffraction pattern based on single crystal structure data (based on reference 56 in the paper). The green asterisks mark reflections arising from *in situ* hydrate formation during the measurement on air (they grow in intensity after subsequent measurements).

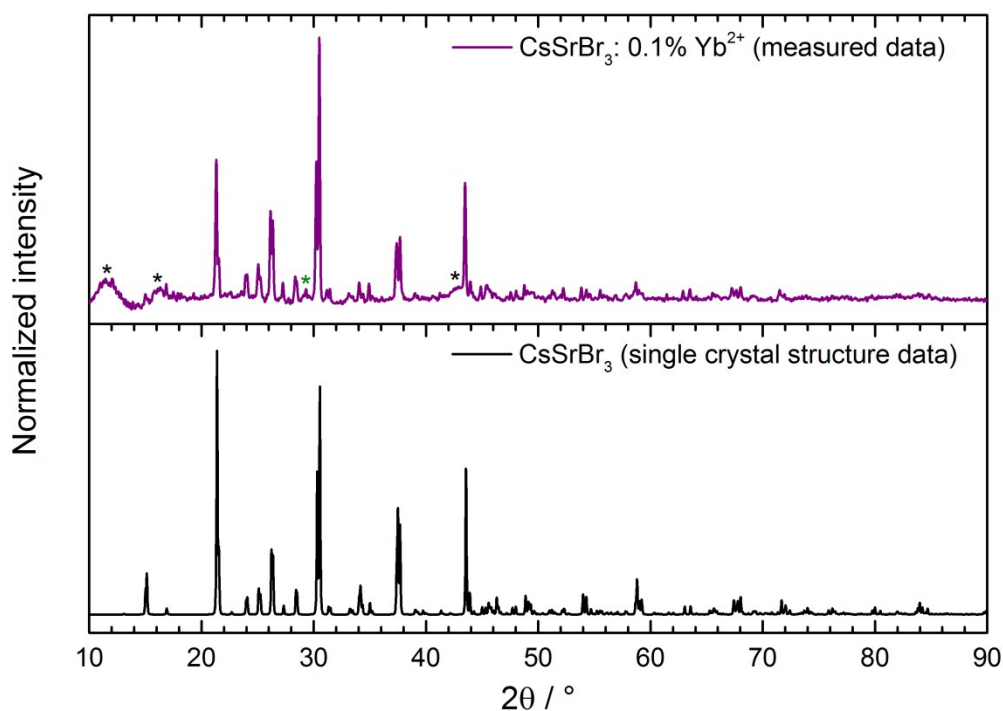

**Figure S4.** Measured XRD pattern of CsSrBr<sub>3</sub>: 0.1% Yb<sup>2+</sup> (violet) compared to the diffraction pattern based on single crystal structure data (based on reference 56 in the paper). The black asterisks mark reflections from the silicon grease used for the sample preparation. The green asterisks mark reflections arising from *in situ* hydrate formation during the measurement on air (they grow in intensity after subsequent measurements).

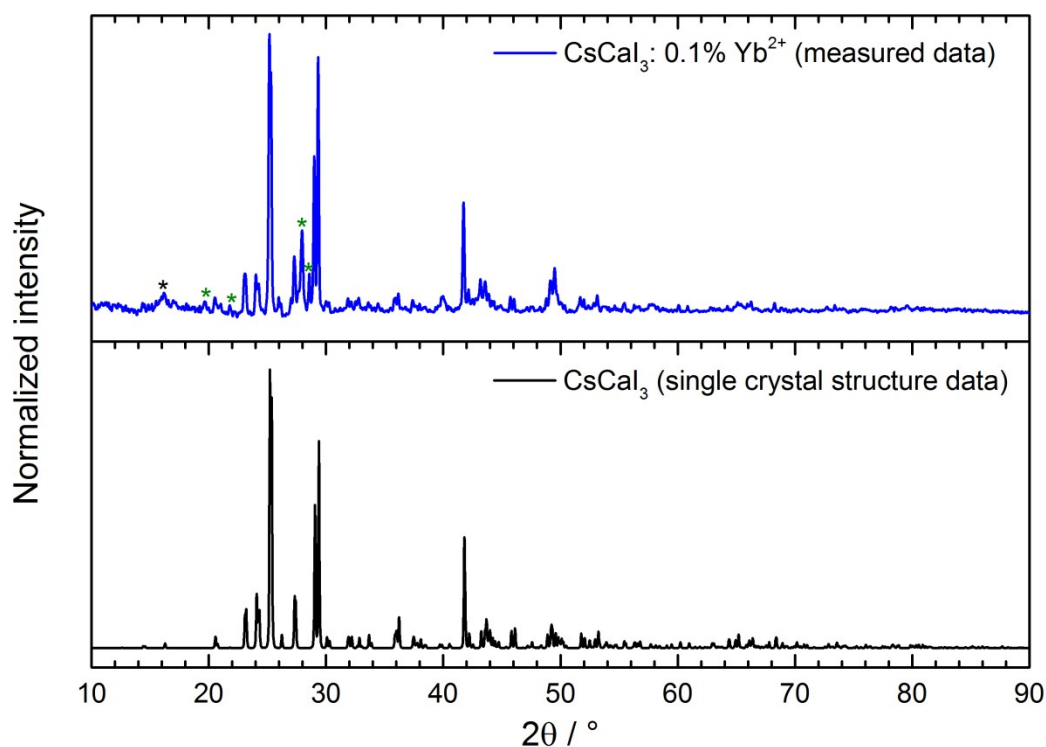

**Figure S5.** Measured XRD pattern of CsCa<sub>3</sub>: 0.1% Yb<sup>2+</sup> (blue) compared to the diffraction pattern based on single crystal structure data (based on reference 56 in the paper). The black asterisk marks a reflection from the silicon grease used for the sample preparation. The green asterisks mark reflections arising from *in situ* hydrate formation during the measurement on air (they grow in intensity after subsequent measurements).

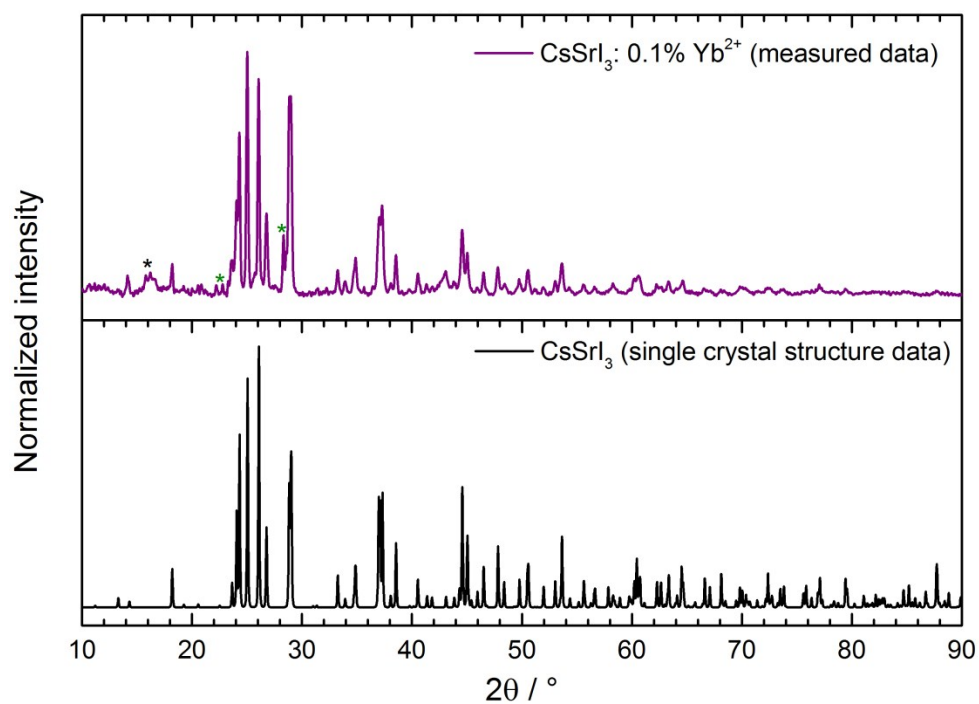

**Figure S6.** Measured XRD pattern of CsSrI<sub>3</sub>: 0.1% Yb<sup>2+</sup> (violet) compared to the diffraction pattern based on single crystal structure data (based on reference 56 in the paper). The black asterisk marks a reflection from the silicon grease used for the sample preparation. The green asterisks mark reflections arising from *in situ* hydrate formation during the measurement on air (they grow in intensity after subsequent measurements).
